# Supplementary material for: Elucidating the Chemistry behind the Reduction of Graphene Oxide Using a Green Approach with Polydopamine
Source: PubMed Central journal article supplement (PMC6630331; doi:10.3390/nano9060902), 2019-06-21
Supplement: nanomaterials-09-00902-s001.pdf [file nanomaterials-09-00902-s001.pdf]

**Table S1.** Elemental compositions investigated by XPS.

|                          | Graphene stacks | GO     | PDA-GO_30 | RGO_30 |
|--------------------------|-----------------|--------|-----------|--------|
| [N]:[C] <sub>spec</sub>  | –               | 0.009  | 0.096     | 0.035  |
| [O]:[C] <sub>spec</sub>  | 0.029           | 0.166  | 0.27      | 0.165  |
| [F]:[C] <sub>spec</sub>  | –               | –      | –         | 0.005  |
| [Na]:[C] <sub>spec</sub> | 0.001           | –      | 0.0004    | 0.013  |
| [Si]:[C] <sub>spec</sub> | 0.004           | 0.006  | 0.013     | 0.005  |
| [S]:[C] <sub>spec</sub>  | –               | 0.012  | 0.002     | 0.002  |
| [Cl]:[C] <sub>spec</sub> | 0.0003          | 0.0002 | –         | 0.0002 |

|                          | PDA-GO_90 | PDA-GO_180 |
|--------------------------|-----------|------------|
| [N]:[C] <sub>spec</sub>  | 0.0831    | 0.0843     |
| [O]:[C] <sub>spec</sub>  | 0.2376    | 0.261      |
| [F]:[C] <sub>spec</sub>  | 0.003     | 0.012      |
| [Na]:[C] <sub>spec</sub> | –         | –          |
| [Si]:[C] <sub>spec</sub> | 0.006     | 0.024      |

**Table S2.** Wide-scan spectrum of the sample recorded from the graphene stacks.

| Peak  | Position BE (eV) | FWHM (eV) | Raw Area (CPS) | RSF   | Atomic Conc % | Mass Conc % |
|-------|------------------|-----------|----------------|-------|---------------|-------------|
| C 1s  | 284.0            | 0.58      | 64387          | 0.278 | 96.71         | 95.17       |
| O 1s  | 532.7            | 2.65      | 5528           | 0.780 | 2.76          | 3.62        |
| Na 1s | 1070.6           | 2.50      | 9106           | 1.685 | 0.09          | 0.18        |
| Si 2p | 103.2            | 4.06      | 6433           | 0.328 | 0.41          | 0.94        |
| Cl 2p | 199.3            | 0.19      | 1377           | 0.891 | 0.03          | 0.09        |

**Table S3.** C 1s spectrum of the sample recorded from the graphene stacks.

| Peak            | Position BE (eV) | FWHM (eV) | Raw Area (CPS) | Height | Atomic Conc % | Mass Conc % |
|-----------------|------------------|-----------|----------------|--------|---------------|-------------|
| C 1s <i>Gr</i>  | 284.00           | 0.75      | 51530          | 71650  | 80.05         | 80.05       |
| C 1s <i>C</i>   | 285.70           | 1.00      | 1840           | 1675   | 2.86          | 2.86        |
| C 1s <i>Sh1</i> | 286.60           | 2.34      | 5302           | 2067   | 8.23          | 8.23        |
| C 1s <i>Sh2</i> | 289.81           | 2.34      | 3389           | 1321   | 5.26          | 5.26        |
| C 1s <i>Sh3</i> | 291.77           | 2.34      | 1933           | 753    | 3.00          | 3.00        |
| C 1s <i>Sh4</i> | 294.36           | 2.34      | 396.0          | 154    | 0.61          | 0.61        |

C 1s *Gr*: AS(90,0.45).**Table S4.** Wide-scan spectrum of the GO sample.

| Peak  | Position BE (eV) | FWHM (eV) | Raw Area (CPS) | RSF   | Atomic Conc % | Mass Conc % |
|-------|------------------|-----------|----------------|-------|---------------|-------------|
| C 1s  | 284.0            | 0.90      | 44545          | 0.278 | 83.79         | 78.23       |
| N 1s  | 401.2            | 0.55      | 731            | 0.477 | 0.79          | 0.86        |
| O 1s  | 531.6            | 2.80      | 22345          | 0.780 | 13.90         | 17.29       |
| Si 2p | 101.2            | 2.45      | 6503           | 0.328 | 0.51          | 1.12        |
| S 2p  | 168.2            | 2.93      | 25088          | 0.668 | 0.98          | 2.44        |
| Cl 2p | 199.3            | 0.20      | 855            | 0.891 | 0.02          | 0.07        |

**Table S5.** C 1s spectrum of the GO sample.

| Peak            | Position<br>BE (eV) | FWHM<br>(eV) | Raw Area<br>(CPS) | Height | Atomic Conc % | Mass Conc % |
|-----------------|---------------------|--------------|-------------------|--------|---------------|-------------|
| C 1s <i>Gr</i>  | 283.99              | 0.91         | 25608             | 27376  | 57.50         | 57.50       |
| C 1s <i>Ph</i>  | 284.75              | 1.14         | 5083              | 4072   | 11.41         | 11.41       |
| C 1s <i>B</i>   | 285.72              | 1.14         | 808               | 647    | 1.81          | 1.81        |
| C 1s <i>C</i>   | 286.07              | 1.20         | 3498              | 2656   | 7.85          | 7.85        |
| C 1s <i>D</i>   | 287.29              | 1.20         | 1144              | 869    | 2.57          | 2.57        |
| C 1s <i>F</i>   | 288.36              | 1.20         | 1208              | 916    | 2.71          | 2.71        |
| C 1s <i>Sh1</i> | 286.36              | 2.36         | 3461              | 1335   | 7.77          | 7.77        |
| C 1s <i>Sh2</i> | 289.57              | 2.36         | 2212              | 853    | 4.96          | 4.96        |
| C 1s <i>Sh3</i> | 291.54              | 2.36         | 1262              | 487    | 2.83          | 2.83        |
| C 1s <i>Sh4</i> | 294.13              | 2.36         | 261               | 101    | 0.58          | 0.58        |

C 1s *Gr*: AS(60,1.0).**Table S6.** N 1s spectrum of the GO sample.

| Peak          | Position<br>BE (eV) | FWHM<br>(eV) | Raw Area<br>(CPS) | Height | Atomic Conc % | Mass Conc % |
|---------------|---------------------|--------------|-------------------|--------|---------------|-------------|
| N 1s <i>L</i> | 399.46              | 1.83         | 191               | 95     | 26.11         | 26.11       |
| N 1s <i>M</i> | 401.15              | 1.83         | 540               | 268    | 73.89         | 73.89       |

**Table S7.** Wide-scan spectrum of the PDA-GO\_30 sample.

| Peak  | Position<br>BE (eV) | FWHM<br>(eV) | Raw Area<br>(CPS) | RSF   | Atomic Conc % | Mass Conc % |
|-------|---------------------|--------------|-------------------|-------|---------------|-------------|
| C 1s  | 284.7               | 2.54         | 13568             | 0.278 | 72.31         | 66.18       |
| N 1s  | 400.1               | 1.74         | 2299              | 0.477 | 6.95          | 7.42        |
| O 1s  | 532.6               | 2.39         | 11051             | 0.780 | 19.57         | 23.86       |
| Na 1s | 1070.9              | 1.98         | 815               | 1.685 | 0.03          | 0.05        |
| Si 2p | 102.2               | 2.49         | 4280              | 0.328 | 0.96          | 2.06        |
| S 2p  | 168.5               | 2.07         | 1584              | 0.668 | 0.18          | 0.43        |

**Table S8.** C 1s spectrum of the PDA-GO\_30 sample.

| Peak            | Position<br>BE (eV) | FWHM<br>(eV) | Raw Area<br>(CPS) | Height | Atomic Conc % | Mass Conc % |
|-----------------|---------------------|--------------|-------------------|--------|---------------|-------------|
| C 1s <i>Ph</i>  | 284.40              | 1.08         | 3729              | 3474   | 27.56         | 27.56       |
| C 1s <i>A</i>   | 285.00              | 1.05         | 3022              | 2623   | 22.33         | 22.33       |
| C 1s <i>B</i>   | 285.81              | 1.13         | 2600              | 2097   | 19.21         | 19.21       |
| C 1s <i>C</i>   | 286.57              | 1.13         | 2600              | 2097   | 19.21         | 19.21       |
| C 1s <i>C1</i>  | 286.57              | 1.13         | 0                 | 0      | 0.00          | 0.00        |
| C 1s <i>Sh1</i> | 288.15              | 1.82         | 1327              | 666    | 9.80          | 9.80        |
| C 1s <i>Sh2</i> | 290.80              | 1.82         | 256               | 129    | 1.89          | 1.89        |

**Table S9.** N 1s spectrum of the PDA-GO\_30 sample.

| Peak          | Position<br>BE (eV) | FWHM<br>(eV) | Raw Area<br>(CPS) | Height | Atomic Conc % | Mass Conc % |
|---------------|---------------------|--------------|-------------------|--------|---------------|-------------|
| N 1s <i>K</i> | 398.61              | 1.60         | 247               | 141    | 10.75         | 10.75       |
| N 1s <i>L</i> | 400.06              | 1.60         | 1680              | 962    | 73.13         | 73.13       |
| N 1s <i>M</i> | 401.71              | 1.60         | 371               | 212    | 16.12         | 16.12       |

**Table S10.** Wide-scan spectrum of the RGO\_30 sample.

| Peak  | Position<br>BE (eV) | FWHM<br>(eV) | Raw Area<br>(CPS) | RSF   | Atomic Conc % | Mass Conc % |
|-------|---------------------|--------------|-------------------|-------|---------------|-------------|
| C 1s  | 284.5               | 1.00         | 39897             | 0.278 | 81.66         | 76.34       |
| N 1s  | 400.0               | 1.81         | 2430              | 0.477 | 2.82          | 3.08        |
| O 1s  | 532.6               | 3.27         | 19847             | 0.780 | 13.48         | 16.79       |
| F 1s  | 689.3               | 2.91         | 15673             | 1.000 | 0.39          | 0.58        |
| Na 1s | 1070.3              | 2.44         | 76371             | 1.685 | 1.08          | 1.94        |
| Si 2p | 102.1               | 2.34         | 4260              | 0.328 | 0.37          | 0.80        |
| S 2p  | 168.7               | 3.29         | 3880              | 0.668 | 0.17          | 0.41        |
| Cl 2p | 199.3               | 0.59         | 622               | 0.891 | 0.02          | 0.05        |

**Table S11.** C 1s spectrum of the RGO\_30 sample.

| Peak            | Position<br>BE (eV) | FWHM<br>(eV) | Raw Area<br>(CPS) | Height | Atomic Conc % | Mass Conc % |
|-----------------|---------------------|--------------|-------------------|--------|---------------|-------------|
| C 1s <i>Ph</i>  | 284.46              | 1.13         | 24831             | 22184  | 62.03         | 62.03       |
| C 1s <i>B</i>   | 285.34              | 1.46         | 2760              | 1720   | 6.89          | 6.89        |
| C 1s <i>C</i>   | 286.29              | 1.46         | 2760              | 1720   | 6.89          | 6.89        |
| C 1s <i>C'</i>  | 286.29              | 1.46         | 2441              | 1521   | 6.10          | 6.10        |
| C 1s <i>F</i>   | 289.36              | 1.46         | 225               | 140    | 0.56          | 0.56        |
| C 1s <i>Sh1</i> | 287.92              | 2.44         | 4733              | 1769   | 11.81         | 11.81       |
| C 1s <i>Sh2</i> | 290.77              | 2.44         | 1812              | 677    | 4.52          | 4.52        |
| C 1s <i>Sh3</i> | 293.23              | 2.44         | 478               | 179    | 1.19          | 1.19        |

C 1s *Ph*: AS(80,0.55).**Table S12.** N 1s spectrum of the RGO\_30 sample.

| Peak          | Position<br>BE (eV) | FWHM<br>(eV) | Raw Area<br>(CPS) | Height | Atomic Conc % | Mass Conc % |
|---------------|---------------------|--------------|-------------------|--------|---------------|-------------|
| N 1s <i>K</i> | 398.85              | 2.09         | 373               | 162    | 15.73         | 15.73       |
| N 1s <i>L</i> | 400.07              | 2.09         | 1999              | 964    | 84.27         | 84.27       |

**Table S13.** Wide-scan spectrum of the PDA-GO\_90 sample.

| Peak. | Position<br>BE (eV) | FWHM<br>(eV) | Raw Area<br>(CPS) | RSF   | Atomic Conc % | Mass Conc % |
|-------|---------------------|--------------|-------------------|-------|---------------|-------------|
| C 1s  | 284.8               | 2.38         | 12829             | 0.278 | 75.21         | 69.84       |
| N 1s  | 400.1               | 1.67         | 1878              | 0.477 | 6.25          | 6.76        |
| O 1s  | 533.0               | 2.58         | 9174              | 0.780 | 17.87         | 22.10       |
| F 1s  | 689.9               | 2.90         | 3266              | 1.000 | 0.24          | 0.35        |
| Si 2p | 102.2               | 2.53         | 1771              | 0.328 | 0.44          | 0.95        |

**Table S14.** C 1s spectrum of the PDA-GO<sub>90</sub> sample.

| Peak            | Position<br>BE (eV) | FWHM<br>(eV) | Raw Area<br>(CPS) | Height | Atomic Conc % | Mass Conc % |
|-----------------|---------------------|--------------|-------------------|--------|---------------|-------------|
| C 1s <i>Ph</i>  | 284.63              | 1.06         | 3203              | 2754   | 24.93         | 24.93       |
| C 1s <i>A</i>   | 285.00              | 1.24         | 2909              | 2137   | 22.63         | 22.63       |
| C 1s <i>B</i>   | 285.71              | 1.23         | 2135              | 1583   | 16.61         | 16.61       |
| C 1s <i>C</i>   | 286.47              | 1.23         | 2135              | 1583   | 16.61         | 16.61       |
| C 1s <i>C1</i>  | 286.47              | 1.23         | 434               | 323    | 3.38          | 3.38        |
| C 1s <i>Sh1</i> | 287.70              | 1.80         | 1269              | 644    | 9.86          | 9.86        |
| C 1s <i>Sh2</i> | 289.16              | 1.80         | 528               | 268    | 4.10          | 4.10        |
| C 1s <i>Sh3</i> | 291.31              | 1.80         | 241               | 123    | 1.87          | 1.87        |

**Table S15.** N 1s spectrum of the PDA-GO<sub>90</sub> sample.

| Peak          | Position<br>BE (eV) | FWHM<br>(eV) | Raw Area<br>(CPS) | Height | Atomic Conc % | Mass Conc % |
|---------------|---------------------|--------------|-------------------|--------|---------------|-------------|
| N 1s <i>K</i> | 398.77              | 1.54         | 220               | 131    | 11.66         | 11.66       |
| N 1s <i>L</i> | 400.19              | 1.54         | 1453              | 862    | 76.87         | 76.87       |
| N 1s <i>M</i> | 401.72              | 1.54         | 217               | 129    | 11.48         | 11.48       |

**Table S16.** Wide-scan spectrum of the PDA-GO<sub>180</sub> sample.

| Peak  | Position<br>BE (eV) | FWHM<br>(eV) | Raw Area<br>(CPS) | RSF   | Atomic Conc % | Mass Conc % |
|-------|---------------------|--------------|-------------------|-------|---------------|-------------|
| C 1s  | 284.9               | 2.23         | 10051             | 0.278 | 72.40         | 65.76       |
| N 1s  | 399.9               | 1.51         | 1492              | 0.477 | 6.10          | 6.46        |
| O 1s  | 532.7               | 2.37         | 7891              | 0.780 | 18.89         | 22.85       |
| F 1s  | 689.1               | 2.51         | 10076             | 1.000 | 0.89          | 1.28        |
| Si 2p | 102.5               | 2.63         | 5659              | 0.328 | 1.72          | 3.65        |

**Table S17.** C 1s spectrum of the PDA-GO<sub>180</sub> sample.

| Peak            | Position<br>BE (eV) | FWHM<br>(eV) | Raw Area<br>(CPS) | Height | Atomic Conc % | Mass Conc % |
|-----------------|---------------------|--------------|-------------------|--------|---------------|-------------|
| C 1s <i>Ph</i>  | 284.35              | 1.23         | 2956              | 2422   | 29.49         | 29.49       |
| C 1s <i>A</i>   | 285.00              | 1.08         | 2515              | 2125   | 25.08         | 25.08       |
| C 1s <i>B</i>   | 285.63              | 1.22         | 1687              | 1259   | 16.82         | 16.82       |
| C 1s <i>C</i>   | 286.37              | 1.22         | 1687              | 1259   | 16.82         | 16.82       |
| C 1s <i>C1</i>  | 286.37              | 1.22         | 0                 | 0      | 0.00          | 0.00        |
| C 1s <i>Sh1</i> | 287.99              | 2.31         | 1059              | 418    | 10.55         | 10.55       |
| C 1s <i>Sh2</i> | 290.64              | 2.31         | 125               | 49     | 1.24          | 1.24        |

**Table S18.** N 1s spectrum of the PDA-GO<sub>180</sub> sample.

| Peak          | Position<br>BE (eV) | FWHM<br>(eV) | Raw Area<br>(CPS) | Height | Atomic Conc % | Mass Conc % |
|---------------|---------------------|--------------|-------------------|--------|---------------|-------------|
| N 1s <i>K</i> | 398.51              | 1.53         | 174               | 103    | 11.59         | 11.59       |
| N 1s <i>L</i> | 400.05              | 1.53         | 1188              | 707    | 79.22         | 79.22       |
| N 1s <i>M</i> | 401.50              | 1.53         | 138               | 82     | 9.19          | 9.19        |
